# Supplementary material
Source: PubMed Central journal article supplement (PMC7941802)

The following are supplemental materials and will be published online only

### **Supplemental Information**

Yimgang DP, Buchwald AG, Coalson JE, Walldorf JA, Bauleni A, Kapito-Tembo A, Mathanga DP, Taylor TE, Laufer MK, Cohee. Population attributable fraction of anemia associated with *P. falciparum* infection in children in Southern Malawi.

#### **Contents:**

- I. Analysis using only surveys in which both age groups had data on anemia (surveys in 2014-2016)

Table S1: Characteristics of study participants by age group

Table S2: Prevalence of anemia among children with *P. falciparum* infection compared to children without *P. falciparum* infection

Figure S1: Adjusted population attributable fraction of anemia associated with *P. falciparum* infection by age group and season

- II. PAF anemia due to malaria among younger children in the 2014 Malawi Malaria Indicator Survey

Table S3: Anemia and *P. falciparum* infection by microscopy among children 0-5 years old in the 2014 Malawi Malaria Indicator Survey

- III. Association of hemoglobin and parasite density

Figure S2: Association of hemoglobin and parasite density by microscopy among children 6-59 months (A) and 5-15 years old (B).

**Table S1. Characteristics of study participants by age group (only surveys 2014-2016)**

|                                                                | Children under 5 years<br>(N=1,713) | School-age children<br>(N=3,759) |
|----------------------------------------------------------------|-------------------------------------|----------------------------------|
| <b>Child factors</b>                                           |                                     |                                  |
| Age in years, median (IQR)                                     | 2.4 (1.2)                           | 9.4 (5.0)                        |
| Female, n (col %)                                              | 863 (50.4)                          | 1937 (51.5)                      |
| Hemoglobin level, mean (SD)                                    | 11.1 (1.3)                          | 12.1 (1.4)                       |
| <i>P. falciparum</i> infection, n (col %)                      | 255 (15.9)                          | 895 (23.8)                       |
| Smear positive, n (col %)                                      | 159 (9.3)                           | 578 (15.4)                       |
| Geometric mean (SD)                                            | 7.4 (2.0)                           | 6.8 (1.7)                        |
| Fever, n (% col)                                               | 537 (31.4)                          | 653 (17.4)                       |
| Anti-malarial drugs, n (% col)                                 | 189 (11.0)                          | 239 (6.4)                        |
| Anemia <sup>§</sup> , n (col %) Any                            | 734 (42.8)                          | 1309 (34.8)                      |
| Mild                                                           | 449 (26.2)                          | 625 (16.6)                       |
| Moderate                                                       | 272 (15.9)                          | 666 (17.7)                       |
| Severe                                                         | 13 (0.8)                            | 18 (0.5)                         |
| Using bed nets, n (col %) <sup>†</sup>                         | 1173 (68.5)                         | 1852 (49.3)                      |
| <b>Household factors</b>                                       |                                     |                                  |
| Number of people in household, median (IQR)                    | 5.0 (2.0)                           | 5.3 (2.0)                        |
| Wealth index, mean (SD) <sup>‡</sup>                           | 0.01 (2.4)                          | 0.10 (2.6)                       |
| Highest education level of household head or spouse, n (col %) |                                     |                                  |
| No schooling                                                   | 165 (9.6)                           | 582 (15.5)                       |
| Primary education                                              | 1020 (59.5)                         | 2192 (58.3)                      |
| Secondary and college                                          | 528 (30.62)                         | 985 (26.2)                       |
| <b>Study factors</b>                                           |                                     |                                  |
| Season, n (col %)                                              |                                     |                                  |
| Rainy                                                          | 937 (54.7)                          | 2046 (54.4)                      |
| Dry                                                            | 776 (45.3)                          | 1713 (45.6)                      |
| District, n (col %)                                            |                                     |                                  |
| Blantyre (urban, peri-urban highland)                          | 360 (21.0)                          | 786 (20.9)                       |
| Chikhwawa (rural, lowland)                                     | 898 (52.4)                          | 1938 (51.6)                      |
| Thyolo (rural, highland)                                       | 455 (26.6)                          | 1035 (27.5)                      |

School-age defined as children 5-15 years old

<sup>§</sup>Mild anemia (age<5y:10.0-10.9g/dL; age 5-11y:11.0-11.4g/dL; females age 12-15y and males age 12-14y:11.0-11.9g/dL; males age 15y:11.0-12.9g/dL), moderate anemia (age<5y:7.0-9.9g/dL; age 5-15y:8.0-10.9g/dL), and severe anemia (age<5y:<7.0g/dL; age 5-15y:<8.0g/dL).

<sup>†</sup> Individual bed net use was assessed by asking whether the individual slept under a bed net the previous night

<sup>‡</sup> Wealth index based on household assets was created using principal component analysis and the Filmer and Pritchett method.<sup>20</sup> Asset indicators were assessed using questions on ownership of house, phone radio, television, bike, and/or car, availability of electricity in the house, food security, source of income, and highest level of education of head of household or spouse.

**Table S2. Prevalence of anemia among children with *P. falciparum* infection compared to children without *P. falciparum* infection (only surveys 2014-2016)**

|              | Age groups    | Exposure groups                | Total n (col %) | Anemia n (row %) | Unadjusted PR of anemia (95% CI) | Adjusted† PR of anemia (95% CI) |
|--------------|---------------|--------------------------------|-----------------|------------------|----------------------------------|---------------------------------|
| Dry season   | Under 5 years | <i>P. falciparum</i> infection | 92 (11.9)       | 53 (57.6)        | 1.45 (1.20, 1.78)**              | 1.49 (1.23, 1.81)**             |
|              |               | No infection                   | 684 (88.1)      | 270 (39.5)       |                                  |                                 |
|              | School-age    | <i>P. falciparum</i> infection | 371 (21.7)      | 166 (44.7)       | 1.54 (1.34, 1.77)**              | 1.48 (1.28, 1.71)**             |
|              |               | No infection                   | 1342 (78.3)     | 390 (29.1)       |                                  |                                 |
| Rainy season | Under 5 years | <i>P. falciparum</i> infection | 163 (17.4)      | 166 (44.7)       | 1.33 (1.13, 1.56)**              | 1.42 (1.26, 1.61)**             |
|              |               | No infection                   | 774 (82.6)      | 390 (29.1)       |                                  |                                 |
|              | School-age    | <i>P. falciparum</i> infection | 524 (25.6)      | 304 (58.0)       | 1.97 (1.77, 2.19)**              | 1.88 (1.68, 2.09)**             |
|              |               | No infection                   | 1522 (74.4)     | 449 (29.5)       |                                  |                                 |

\*\* p-value <0.001

† Log-binomial models controlling for district, education, net use, wealth, and survey cluster

PR: Prevalence ratio; School-age defined as children 5-15 years old

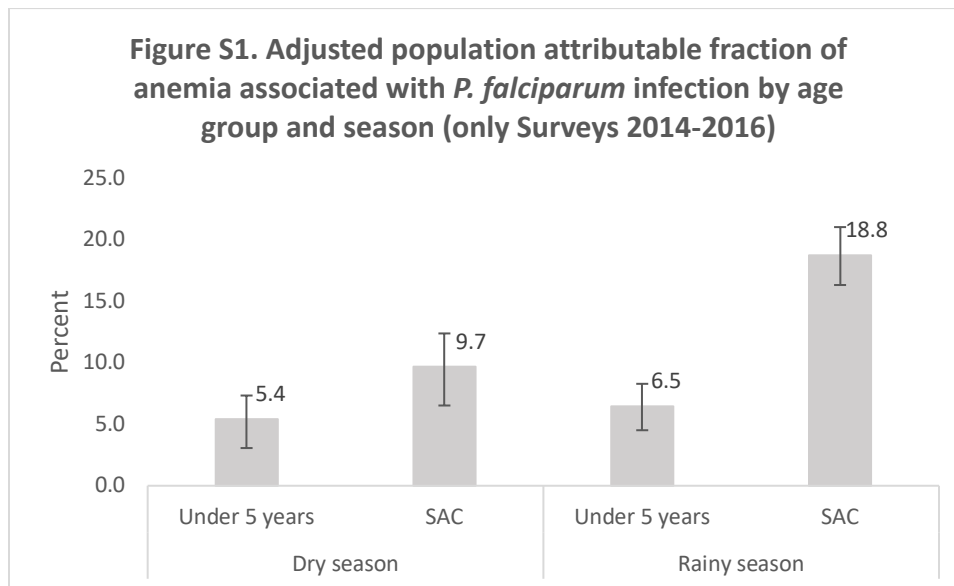

Three-way interaction malaria, age category, and season significant:  $p=0.0365$

Interaction between malaria and season among children below 5 years:  $p=0.57$

Interaction between malaria and season among children aged 5-15 years:  $p=0.0003$

Pooled aPR : 1.37; 95% CI : 1.21-1.55

Pooled PAF: 5.26; 95% CI: 3.38-6.91

**Table S3: Anemia and P. falciparum infection by microscopy among children 0-5 years old in the 2014 Malawi Malaria Indicator Survey**

|                            | <b>Anemic</b> | <b>Not anemic</b> |
|----------------------------|---------------|-------------------|
| <b>Microscopy positive</b> | 347           | 163               |
| <b>Microscopy negative</b> | 641           | 763               |

P. falciparum prevalence = 26.6%

PAF anemia due to malaria = 11.6%

**Figure S2: Association of hemoglobin and parasite density by microscopy among children 6-59 months (A) and 5-15 years old (B).** Slope is interpreted as the change in hemoglobin for each log increase in parasite density. P-value for both models was <0.0001.

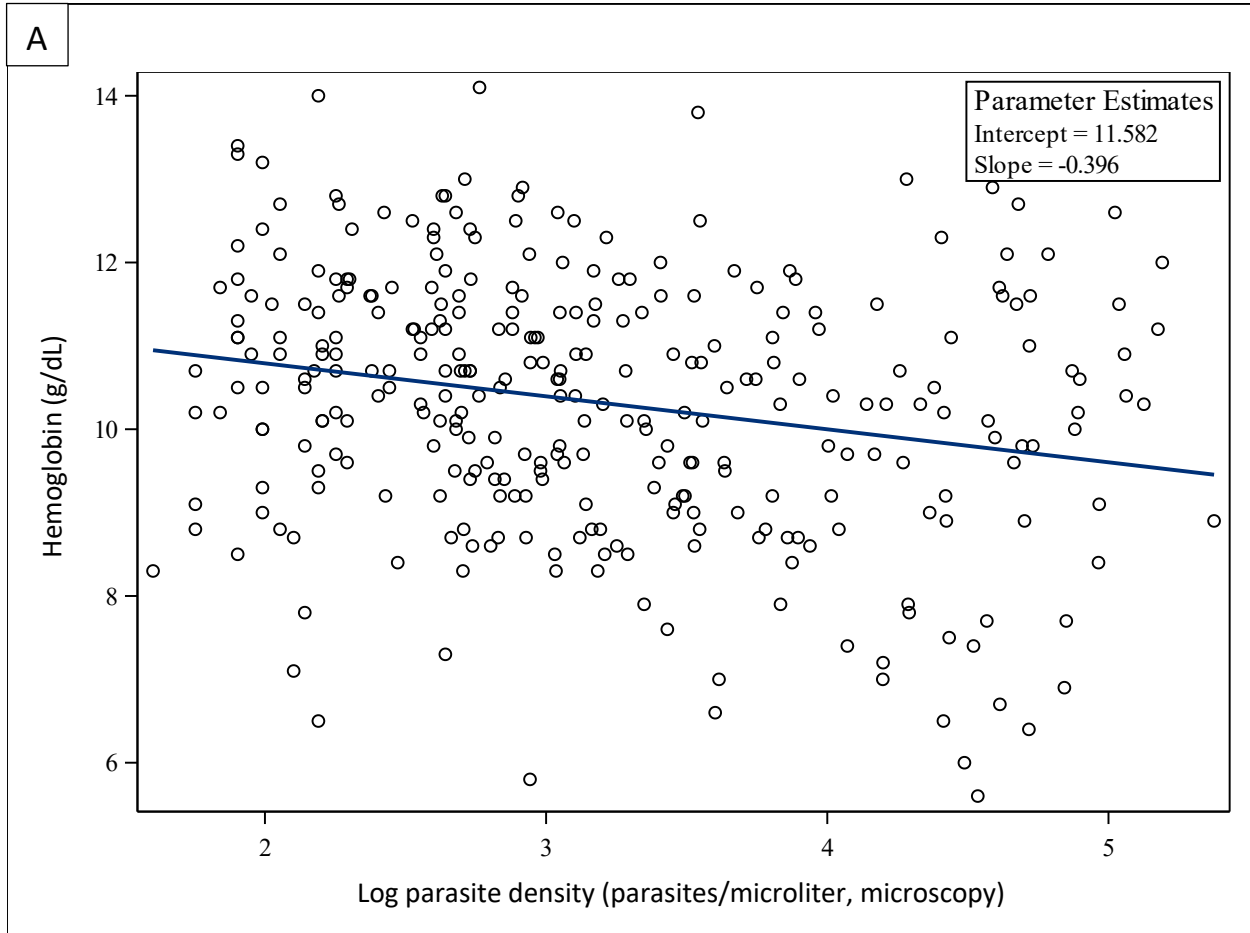

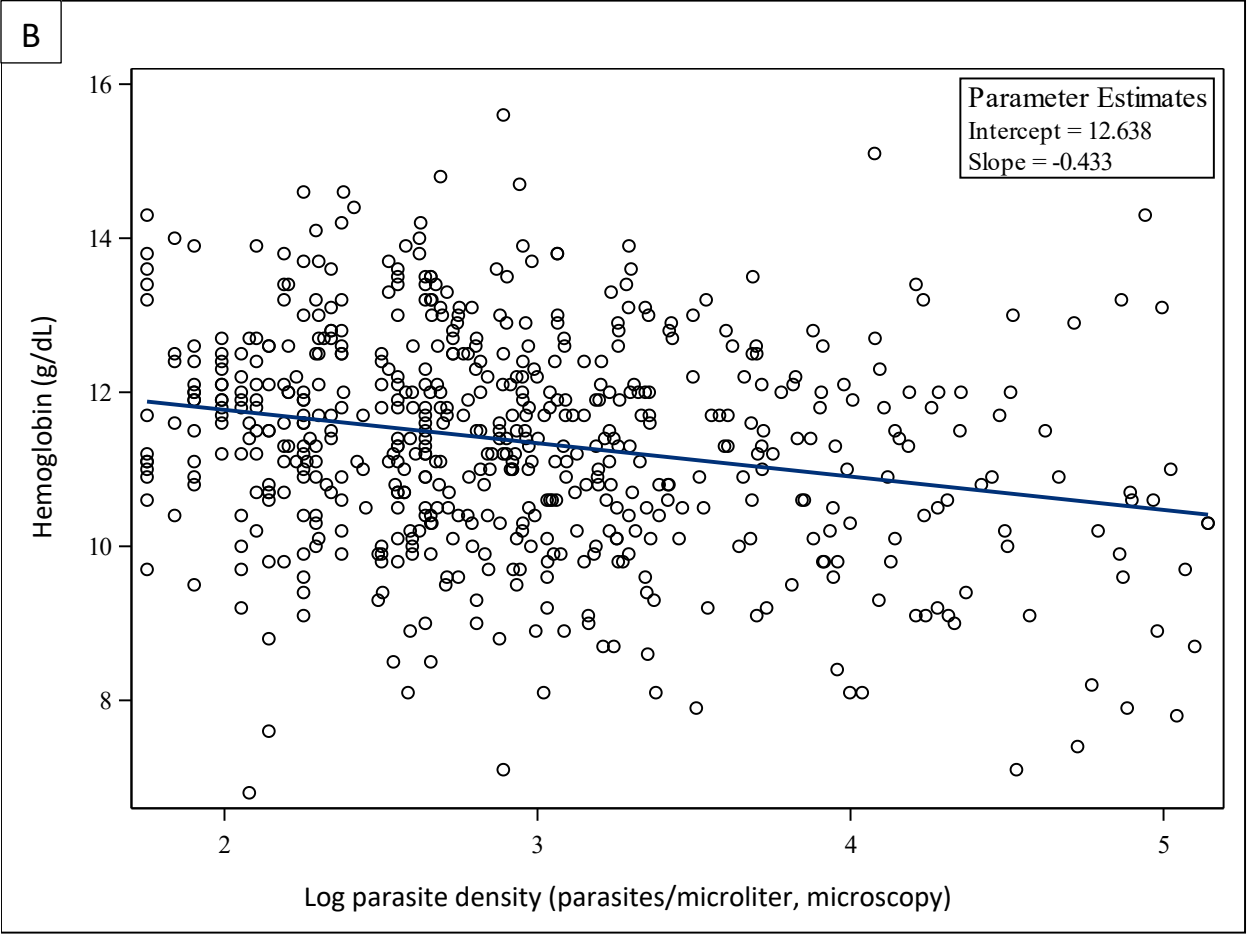

Supplement: tpmd201120.SD1.pdf [file tpmd201120.SD1.pdf]
